# Supplementary material for: Optimisation of TP53 reporters by systematic dissection of synthetic TP53 response elements
Source: PubMed Central journal article supplement — Nucleic Acids Res. 2023 Aug 31;51(18):9690–702. doi: 10.1093/nar/gkad718 (PMC10570033; doi:10.1093/nar/gkad718), 2023-08-31
Supplement: gkad718_supplemental_file.pdf [file gkad718_supplemental_file.pdf]

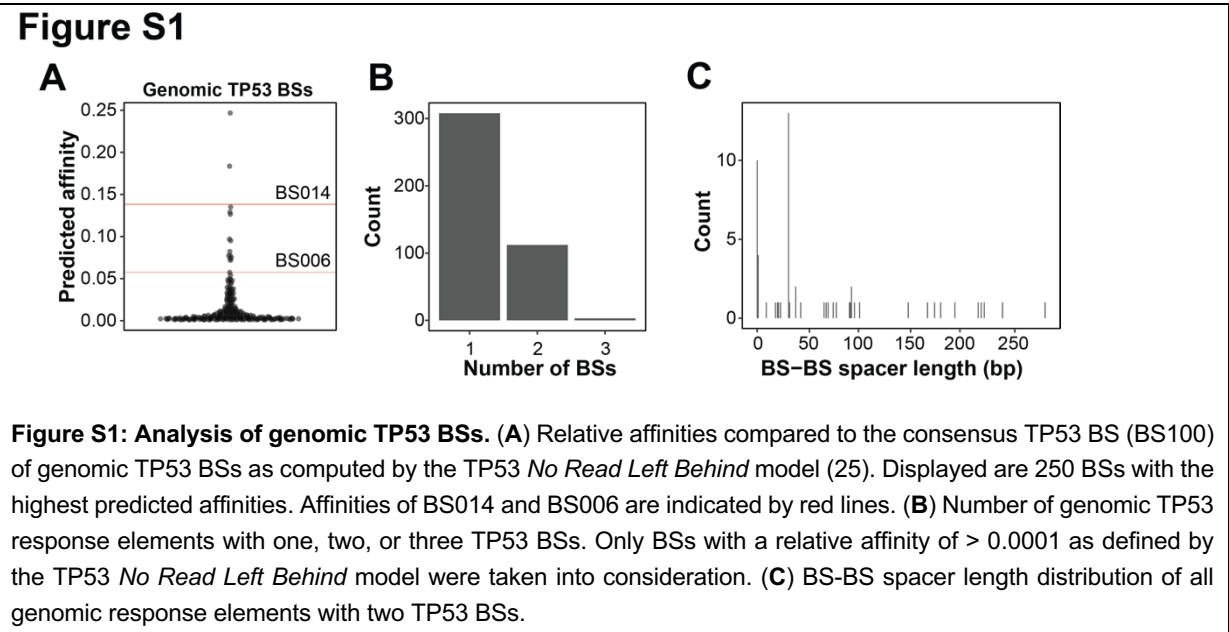

**Supplementary Table S1:** Sequences of the primers used in the study.

| Name  | Used for                                                       | Sequence (5'-3')                                                                                           |
|-------|----------------------------------------------------------------|------------------------------------------------------------------------------------------------------------|
| MT024 | Oligo library amplification and addition EcoRI overhang        | ACCTTGG AATTCCGGAGCGAACCGA<br>GTTAG                                                                        |
| MT025 | Oligo library amplification and addition NheI overhang         | CGCTTAGCTAGCCTCTTGGATGCGA<br>CGATG                                                                         |
| MT165 | Gene-specific primer for cDNA synthesis                        | CCTCTCCGCCGCCACCAGCTCGAA<br>CTCCAC                                                                         |
| MT164 | cDNA amplification indexed primer including Illumina S1 and p7 | CAAGCAGAAGACGGCATAACGAGATN<br>NNNNNNNGTGACTGGAGTTCAGACG<br>TGTGCTCTTCCGATCTGGTGATGCG<br>GCACTCGATCTTCATGGC |
| MT397 | cDNA amplification indexed primer including Illumina S2 and p5 | AATGATACGGCGACCACCGAGATCT<br>ACACNNNNNNNACACTCTTCCCTA<br>CACGACGCTCTTCCGATCT                               |
